# Supplementary material for: Predictions of the physicochemical properties of amino acid side chain analogs using molecular simulation
Source: Royal Society of Chemistry journal article supplement (doi:10.1039/c5cp05393e), 2016-01-01
Supplement: c5cp05393e1.pdf [file c5cp05393e1.pdf]

## Supplementary Information

### Predictions of the physicochemical properties of amino acid side chain analogs using molecular simulation

Alauddin Ahmed‡ and Stanley I. Sandler\*

*Center for Molecular and Engineering Thermodynamics, Department of Chemical and  
Biomolecular Engineering, University of Delaware, Newark, Delaware 19716, USA*

‡ Current Address: Mechanical Engineering Department, University of Michigan, Ann  
Arbor, Michigan 48109, USA

\*Corresponding Author: [sandler@udel.edu](mailto:sandler@udel.edu)

(Version 21 January 2016)

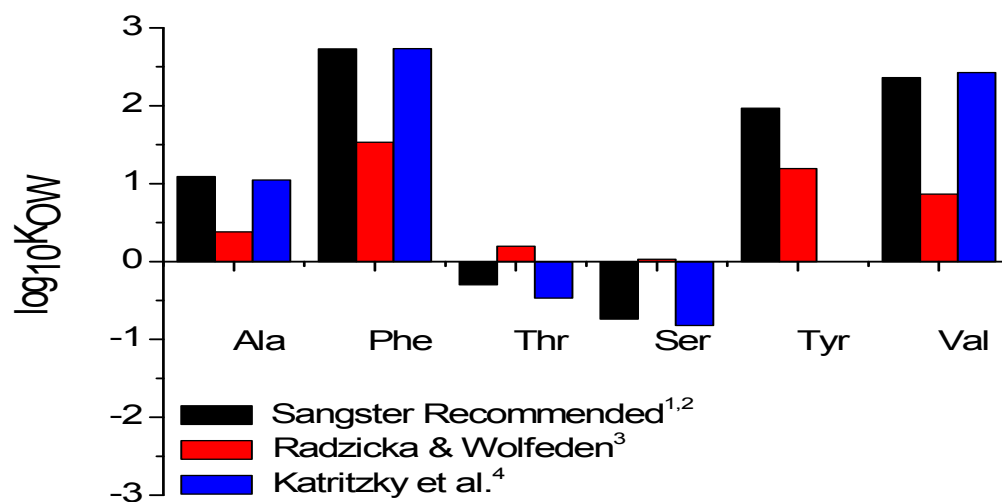

Figure S1: Octanol-water partition coefficients calculated and compared with recommended values (data shown in the Table S1).

Table S1: Octanol-water partition coefficients from different sources.<sup>1-4</sup>

| Amino Acid          | Side Chain | Sangster <sup>1,2</sup> Recommended | Radzicka and Wolfenden <sup>3</sup> | Katritzky et al. <sup>4</sup> |
|---------------------|------------|-------------------------------------|-------------------------------------|-------------------------------|
| Ala (Alanine)       | Methane    | 1.09                                | 0.38                                | 1.05                          |
| Phe (Phenylalanine) | Toluene    | 2.73                                | 1.53                                | 2.73                          |
| Thr (Threonine)     | Ethanol    | -0.3                                | 0.20                                | -0.47                         |
| Ser (Serine)        | Methanol   | -0.74                               | 0.03                                | -0.82                         |
| Tyr (Tyrosine)      | p-Cresol   | 1.97                                | 1.19                                | ---                           |
| Val (Valine )       | Propane    | 2.36                                | 0.86                                | 2.43                          |

Table S2a: Self-solvation free energies (in kcal/mol) of 1-octanol.

| Force Field               | Experiment | $\Delta G_{self}$ |
|---------------------------|------------|-------------------|
| CGenFF/ParamChem (charge) | -8.41      | $-10.02 \pm 0.67$ |
| GAFF/AM1-BCC (charge)     |            | $-8.31 \pm 0.24$  |
| OPLS-AA (default charge)  |            | $-7.05 \pm 0.47$  |

Table S2b: Self-solvation free energies (in kcal/mol) of amino acid side chain analogs ( $\Delta G_{self}$ ).

| Amino acid          | Side chain analog/other | Experimental | CGenFF/ParamChem (charge) | GAFF/AM1-BCC (charge) | OPLS-AA          |
|---------------------|-------------------------|--------------|---------------------------|-----------------------|------------------|
| Ala (Alanine)       | Methane                 | ---          | ---                       | ---                   | ---              |
| Phe (Phenylalanine) | Toluene                 | -5.17        | $-4.45 \pm 0.21$          | $-3.98 \pm 0.21$      | $-4.86 \pm 0.18$ |
| Thr (Threonine)     | Ethanol                 | -5.08        | $-5.16 \pm 0.24$          | $-4.60 \pm 0.17$      | $-4.58 \pm 0.21$ |
| Ser (Serine)        | Methanol                | -4.90        | $-4.50 \pm 0.17$          | $-3.79 \pm 0.20$      | $-4.65 \pm 0.14$ |
| Tyr (Tyrosine)      | p-Cresol                | -8.46        | $-7.86 \pm 0.36$          | $-7.69 \pm 0.33$      | $-8.26 \pm 0.51$ |
| Val (Valine)        | Propane                 | ---          | ---                       | ---                   | ---              |
|                     | AUE (kcal/mol)          |              | 0.45                      | 0.90                  | 0.33             |
|                     | RMSE (kcal/mol)         |              | 0.51                      | 0.94                  | 0.34             |

Table S3: Hydration free energies (in kcal/mol) of amino acid side chain analogs ( $\Delta G_{wat}$ ).

| Amino acid          | Side chain analog | Experimental | CGenFF/ParamChem (charge) | GAFF/AM1-BCC (charge) <sup>5</sup> | OPLS-AA <sup>6</sup> |
|---------------------|-------------------|--------------|---------------------------|------------------------------------|----------------------|
| Ala (Alanine)       | Methane           | 1.95         | $2.44 \pm 0.03$           | $2.54 \pm 0.01$                    | $2.31 \pm 0.02$      |
| Phe (Phenylalanine) | Toluene           | -0.78        | $0.24 \pm 0.05$           | $-0.71 \pm 0.02$                   | $-0.54 \pm 0.04$     |
| Thr (Threonine)     | Ethanol           | -5.03        | $-4.52 \pm 0.04$          | $-3.45 \pm 0.03$                   | $-4.11 \pm 0.03$     |
| Ser (Serine)        | Methanol          | -5.03        | $-4.58 \pm 0.03$          | $-3.48 \pm 0.01$                   | $-4.36 \pm 0.02$     |
| Tyr (Tyrosine)      | p-Cresol          | -6.11        | $-4.02 \pm 0.05$          | $-5.36 \pm 0.02$                   | $-5.25 \pm 0.04$     |
| Val (Valine)        | Propane           | 1.99         | $2.42 \pm 0.03$           | $2.56 \pm 0.02$                    | $2.59 \pm 0.03$      |
|                     | AUE (kcal/mol)    |              | 0.83                      | 0.85                               | 0.61                 |
|                     | RMSE (kcal/mol)   |              | 1.02                      | 1.01                               | 0.66                 |

Table S4: Solvation free energy (in kcal/mol) of amino acid side chain analogs in 1-octanol ( $\Delta G_{oct}$ ).

| Amino acid          | Side chain analog | Experiment | CGenFF/ParamChem (charge) | GAFF/AM1-BCC (charge) | OPLS-AA          |
|---------------------|-------------------|------------|---------------------------|-----------------------|------------------|
| Ala (Alanine)       | Methane           | 0.52       | $0.76 \pm 0.18$           | $1.03 \pm 0.19$       | $0.68 \pm 0.12$  |
| Phe (Phenylalanine) | Toluene           | -4.51      | $-3.98 \pm 0.20$          | $-3.27 \pm 0.26$      | $-3.88 \pm 0.35$ |
| Thr (Threonine)     | Ethanol           | -4.39      | $-4.15 \pm 0.26$          | $-3.65 \pm 0.33$      | $-4.31 \pm 0.35$ |
| Ser (Serine)        | Methanol          | -3.91      | $-3.24 \pm 0.29$          | $-3.07 \pm 0.24$      | $-2.86 \pm 0.29$ |
| Tyr (Tyrosine)      | p-Cresol          | -8.84      | $-8.07 \pm 0.35$          | $-7.44 \pm 0.24$      | $-8.17 \pm 0.40$ |
| Val (Valine)        | Propane           | -1.32      | $-0.53 \pm 0.29$          | $-0.62 \pm 0.18$      | $-0.30 \pm 0.21$ |
|                     | AUE (kcal/mol)    |            | 0.54                      | 0.90                  | 0.60             |
|                     | RMSE (kcal/mol)   |            | 0.58                      | 0.96                  | 0.71             |

Table S5a: Logarithm of vapor pressures in Pa unit ( $\log_{10} P_{vap}^{liq}$ ) for 1-octanol models.

| Force Field               | Molecular Weight (g/mol) | Density, $\rho$ (g/L) | Experiment | $\log_{10} P_{vap}^{liq/sol}$ |
|---------------------------|--------------------------|-----------------------|------------|-------------------------------|
| CGenFF/ParamChem (charge) | 130.23                   | 827                   | 1.03       | -0.15                         |
| GAFF/AM1-BCC (charge)     |                          |                       |            | 1.10                          |
| OPLS-AA                   |                          |                       |            | 2.03                          |

Table S5b: Logarithm of vapor pressures in Pa unit ( $\log_{10} P_{vap}^{liq}$ ) for amino acid side chain analogs.

| Amino acid          | Side chain analog | Molecular Weight (g/mol) | Density, $\rho$ (g/L) | Experiment | CGenFF/ParamChem (charge) | GAFF/AM1-BCC (charge) | OPLS-AA |
|---------------------|-------------------|--------------------------|-----------------------|------------|---------------------------|-----------------------|---------|
| Ala (Alanine)       | Methane           | 16.04                    |                       | 7.79       | ---                       | ---                   | ---     |
| Phe (Phenylalanine) | Toluene           | 92.14                    | 852                   | 3.58       | 4.10                      | 4.44                  | 3.79    |
| Thr (Threonine)     | Ethanol           | 46.07                    | 799                   | 3.90       | 3.85                      | 4.26                  | 4.26    |
| Ser (Serine)        | Methanol          | 32.04                    | 759                   | 4.23       | 4.48                      | 4.18                  | 4.36    |

|                |                 |        |      |      |      |      |      |
|----------------|-----------------|--------|------|------|------|------|------|
| Tyr (Tyrosine) | p-Cresol        | 108.13 | 1033 | ---  | ---  | ---  | ---  |
| Val (Valine )  | Propane         | 44.1   |      | 5.98 | ---  | ---  | ---  |
|                | AUE (log unit)  |        |      |      | 0.27 | 0.43 | 0.24 |
|                | RMSE (log unit) |        |      |      | 0.33 | 0.54 | 0.25 |

**Table S6:** Logarithms of solubilities in mol/L units ( $\log_{10}S_{wat}$ ) of amino acid side chain analogs in water calculated from vapor pressures ( $P_{vap}^{liq}$ ) and solvation free energies in water ( $\Delta G_{wat}$ ) using eqn. (3).

| Amino acid          | Side chain analog | Molecular Weight (g/mol) | Density, $\rho$ (g/L) | Experiment | CGenFF/ParamChem (charge) | GAFF/AM1-BCC (charge) | OPLS-AA |
|---------------------|-------------------|--------------------------|-----------------------|------------|---------------------------|-----------------------|---------|
| Ala (Alanine)       | Methane           | 16.04                    |                       | -2.86      | ---                       | ---                   | ---     |
| Phe (Phenylalanine) | Toluene           | 92.14                    | 852                   | -2.24      | -2.47                     | -1.43                 | -2.21   |
| Thr (Threonine)     | Ethanol           | 46.07                    | 799                   | 1.34       | 0.77                      | 0.40                  | 0.88    |
| Ser (Serine)        | Methanol          | 32.04                    | 759                   | 1.49       | 1.44                      | 0.34                  | 1.16    |
| Tyr (Tyrosine)      | p-Cresol          | 108.13                   | 1033                  | ---        | ---                       | ---                   | ---     |
| Val (Valine )       | Propane           | 44.1                     |                       | -2.85      | ---                       | ---                   | ---     |
|                     | AUE (log unit)    |                          |                       |            | 0.28                      | 0.97                  | 0.28    |
|                     | RMSE (log unit)   |                          |                       |            | 0.35                      | 0.98                  | 0.33    |

**Table S7:** Logarithms of solubilities in mol/L units ( $\log_{10}S_{oct}$ ) of amino acid side chain analogs in 1-octanol calculated from vapor pressures ( $P_{vap}^{liq}$ ) and solvation free energies in 1-octanol ( $\Delta G_{oct}$ ) using eqn. (3).

| Amino acid          | Side chain analog/other | Molecular Weight (g/mol) | Density, $\rho$ (g/L) | Experiment | CGenFF/ParamChem (charge) | GAFF/AM1-BCC (charge) | OPLS-AA |
|---------------------|-------------------------|--------------------------|-----------------------|------------|---------------------------|-----------------------|---------|
| Ala (Alanine)       | Methane                 | 16.04                    |                       | 2.22       | ---                       | ---                   | ---     |
| Phe (Phenylalanine) | Toluene                 | 92.14                    | 852                   | 0.49       | 0.62                      | 0.44                  | 0.25    |
| Thr (Threonine)     | Ethanol                 | 46.07                    | 799                   | 0.72       | 0.50                      | 0.55                  | 1.03    |
| Ser (Serine)        | Methanol                | 32.04                    | 759                   | 0.70       | 0.46                      | 0.04                  | 0.06    |
| Tyr (Tyrosine)      | p-Cresol                | 108.13                   | 1033                  | ---        | ---                       | ---                   | ---     |
| Val (Valine )       | Propane                 | 44.1                     |                       | ---        | ---                       | ---                   | ---     |
|                     | AUE (log unit)          |                          |                       |            | 0.20                      | 0.30                  | 0.40    |
|                     | RMSE (log unit)         |                          |                       |            | 0.20                      | 0.40                  | 0.43    |

**Table S8:** Logarithms of octanol-water ( $\log_{10}K_{OW}$ ) partition coefficient of amino acid side chain analogs.

| Amino Acid Analog   | Experiment      | CGenFF       | GAFF                                   | OPLS-AA                                |
|---------------------|-----------------|--------------|----------------------------------------|----------------------------------------|
|                     |                 | This work    | This work +<br>(Mobley et al.<br>2009) | This work +<br>(Shirts et al.<br>2003) |
| Ala (Alanine)       | 1.09            | 1.23 ± 0.13  | 1.10 ± 0.14                            | 1.19 ± 0.09                            |
| Phe (Phenylalanine) | 2.73            | 3.09 ± 0.15  | 1.87 ± 0.19                            | 2.45 ± 0.26                            |
| Thr (Threonine)     | -0.3            | -0.27 ± 0.19 | 0.15 ± 0.24                            | 0.15 ± 0.26                            |
| Ser (Serine)        | -0.74           | -0.98 ± 0.21 | -0.30 ± 0.17                           | -1.10 ± 0.21                           |
| Tyr (Tyrosine)      | 1.97            | 2.97 ± 0.26  | 1.53 ± 0.17                            | 2.14 ± 0.30                            |
| Val (Valine )       | 2.36            | 2.17 ± 0.22  | 2.33 ± 0.13                            | 2.12 ± 0.17                            |
|                     | AUE (kcal/mol)  | 0.33         | 0.37                                   | 0.27                                   |
|                     | RMSE (kcal/mol) | 0.45         | 0.47                                   | 0.29                                   |

**Table S9:** Logarithms of air-water partition coefficient ( $\log_{10}K_{AW}$ ) of amino acid side chain analogs calculated from solvation free energies in water.

| Amino acid          | Side chain analog/other | Experiment | CGenFF | GAFF  | OPLS-AA |
|---------------------|-------------------------|------------|--------|-------|---------|
| Ala (Alanine)       | Methane                 | -1.45      | -1.79  | -1.86 | -1.69   |
| Phe (Phenylalanine) | Toluene                 | 0.58       | -0.17  | 0.52  | 0.40    |
| Thr (Threonine)     | Ethanol                 | 3.67       | 3.32   | 2.53  | 3.01    |
| Ser (Serine)        | Methanol                | 3.74       | 3.36   | 2.55  | 3.20    |
| Tyr (Tyrosine)      | p-Cresol                | 4.5        | 2.95   | 3.93  | 3.85    |
| Val (Valine )       | Propane                 | -1.44      | -1.78  | -1.88 | -1.90   |
|                     | AUE (log unit)          |            | 0.62   | 0.63  | 0.46    |
|                     | RMSE (log unit)         |            | 0.76   | 0.75  | 0.49    |

**Table S10:** Logarithms of air-octanol partition coefficient ( $\log_{10}K_{AO}$ ) of amino acid side chain analogs calculated from solvation free energies in 1-octanol.

| Amino acid          | Side chain analog/other | Experimental | CGenFF | GAFF  | OPLS-AA |
|---------------------|-------------------------|--------------|--------|-------|---------|
| Ala (Alanine)       | Methane                 | -0.38        | -0.56  | -0.76 | -0.50   |
| Phe (Phenylalanine) | Toluene                 | 3.31         | 2.91   | 2.39  | 2.85    |
| Thr (Threonine)     | Ethanol                 | 3.25         | 3.04   | 2.68  | 3.16    |
| Ser (Serine)        | Methanol                | 2.88         | 2.37   | 2.25  | 2.10    |
| Tyr (Tyrosine)      | p-Cresol                | 6.48         | 5.91   | 5.46  | 5.99    |
| Val (Valine)        | Propane                 | 0.97         | 0.39   | 0.45  | 0.22    |
|                     | AUE (log unit)          |              | 0.41   | 0.67  | 0.45    |
|                     | RMSE (log unit)         |              | 0.44   | 0.71  | 0.52    |

**Table S11a:** Comparison of self-solvation free energies calculated using solvation models and force field-based molecular simulations.

| Method                                    | AUE<br>(kcal/mol) | RMSE<br>(kcal/mol) |
|-------------------------------------------|-------------------|--------------------|
| SM5.4/AM1                                 | 0.21              | 0.26               |
| SM5.4/PM3                                 | 0.19              | 0.20               |
| SM5.2R/AM1//MM3                           | 1.63              | 2.51               |
| SM5.2R/PM3//MM3                           | 1.17              | 1.75               |
| SM5.2R/AM1//MM2                           | 0.30              | 0.35               |
| SM5.2R/PM3//MM2                           | 0.29              | 0.29               |
| SM5.0R/MM3                                | 0.74              | 0.96               |
| SM5.0R/MM2                                | 0.26              | 0.36               |
| Simulation: CGenFF/ParamChem Charge       | 0.40              | 0.48               |
| Simulation: GAFF/AM1-BCC charge           | 0.93              | 0.98               |
| <b>Simulation: OPLS-AA/Default Charge</b> | <b>0.35</b>       | <b>0.37</b>        |

**Table S11b:** Comparison of self-solvation free energy of *p*-cresol calculated using solvation models and force field-based molecular simulations.

| Method         | <i>p</i> -cresol                       |                                           |                              |
|----------------|----------------------------------------|-------------------------------------------|------------------------------|
|                | $\Delta G_{self}^{expt}$<br>(kcal/mol) | $\Delta G_{self}^{sim/mod}$<br>(kcal/mol) | Unsigned Error<br>(kcal/mol) |
| SM5.42R/HF     |                                        | -9.68                                     | 1.22                         |
| SM5.42R/HB3LYP |                                        | -9.77                                     | 1.31                         |
| SM5.42R/AM1    |                                        | -9.80                                     | 1.34                         |
| CGenFF         | -8.46                                  | -7.86                                     | 0.60                         |
| GAFF           |                                        | -7.69                                     | 0.77                         |
| <b>OPLS-AA</b> |                                        | <b>-8.26</b>                              | <b>0.20</b>                  |

**Table S12a:** Comparison of logarithm of vapor pressures (in Pa) calculated using solvation models and force field-based molecular simulations.

| Method                                            | AUE<br>(log unit) | RMSE<br>(log unit) |
|---------------------------------------------------|-------------------|--------------------|
| SM5.4: AM1 <sup>7-9</sup>                         | 0.14              | 0.16               |
| SM5.4: PM3 <sup>7-9</sup>                         | 0.12              | 0.13               |
| SM5.2R: AM1//MM3 <sup>7-9</sup>                   | 1.17              | 1.84               |
| SM5.2R: PM3//MM3 <sup>7-9</sup>                   | 0.84              | 1.27               |
| SM5.2R: AM1//MM2 <sup>7-9</sup>                   | 0.21              | 0.25               |
| SM5.2R: PM3//MM2 <sup>7-9</sup>                   | 0.19              | 0.21               |
| SM5.0R: MM3 <sup>7-9</sup>                        | 0.53              | 0.69               |
| SM5.0R: MM2 <sup>7-9</sup>                        | 0.18              | 0.24               |
| Simulation: CGenFF/ParamChem (charge) (this work) | 0.27              | 0.33               |
| Simulation: GAFF/AM1-BCC (charge) (this work)     | 0.43              | 0.54               |
| Simulation: OPLS-AA/ (default charge) (this work) | 0.24              | 0.25               |



**Table S12b:** Comparison of logarithm of vapor pressures (in Pa) of tyr (*p*-cresol) calculated using solvation models and force-field based molecular simulations.

| Method         | Tyr ( <i>p</i> -cresol) |                               |                  |
|----------------|-------------------------|-------------------------------|------------------|
|                | Expt.<br>(log unit)     | $\log(P^{vap} \text{ in Pa})$ | UE<br>(log unit) |
| SM5.42R/HF     | 1.13                    | 2.01                          | 0.88             |
| SM5.42R/HB3LYP |                         | 1.99                          | 0.86             |
| SM5.42R/AM1    |                         | 2.25                          | 1.12             |
| CGenFF         |                         | 1.60                          | 0.47             |
| GAFF           |                         | 1.73                          | 0.60             |
| <b>OPLS-AA</b> |                         | <b>1.59</b>                   | <b>0.46</b>      |

**Table S13:** Comparison of logarithms of sub-cooled solubility (in mol/L unit) calculated using solvation models and force field-based molecular simulations.

| Method         | Phe (Toluene)       |           |                  | Tyr ( <i>p</i> -cresol) |           |                  |
|----------------|---------------------|-----------|------------------|-------------------------|-----------|------------------|
|                | Expt.<br>(log unit) | $\log(S)$ | UE<br>(log unit) | Expt.                   | $\log(S)$ | UE<br>(log unit) |
| SM5.42R/HF     | -2.24               | -2.00     | 0.24             | -0.52                   | 0.18      |                  |
| SM5.42R/HB3LYP |                     | -1.88     | 0.36             | -0.48                   | 0.22      |                  |
| SM5.42R/AM1    |                     | -1.99     | 0.25             | -0.45                   | 0.25      |                  |
| CGenFF         |                     | -2.47     | 0.23             | -0.70                   | 1.22      |                  |
| GAFF           |                     | -1.43     | 0.81             | -0.81                   | 0.11      |                  |
| OPLS-AA        |                     | -2.21     | 0.03             | -1.03                   | 0.33      |                  |

## NPT-EE Work Flow with an Example

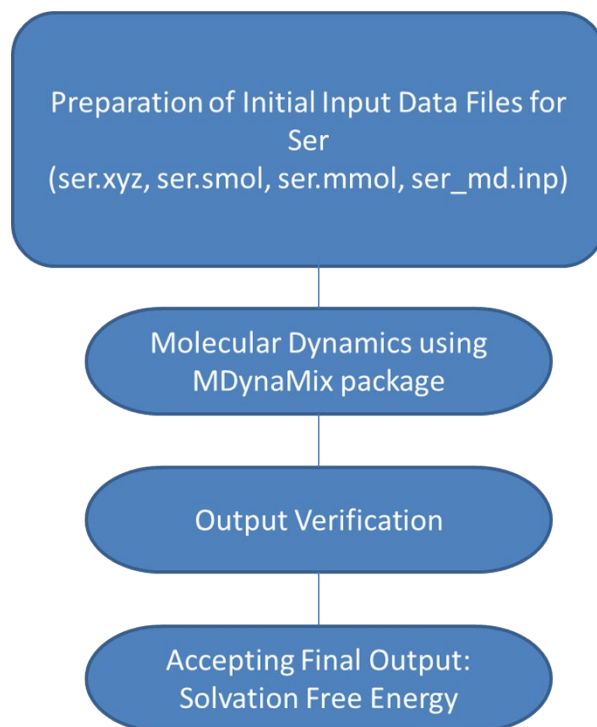

## **Preparation of Input Data Files**

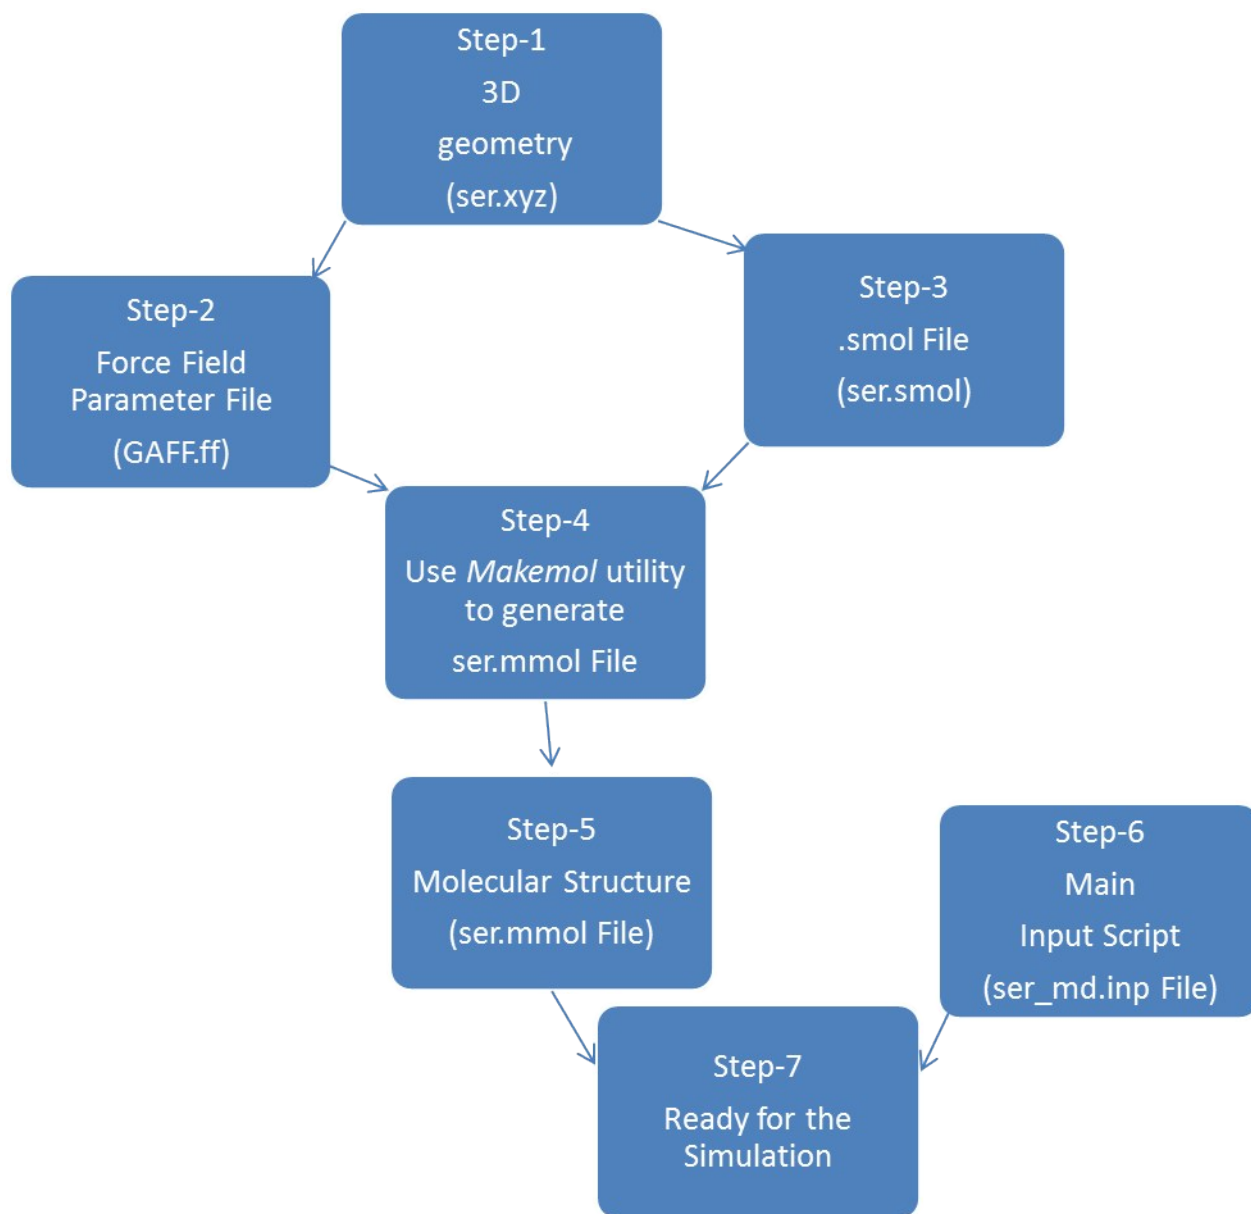

## Ser Topology and Parameter File (ser.mmol)

```
#CGenFF Force Field Parameters  
#Prepared by Alauddin, Sandler group, UD  
# April 12, 2012
```

```

# Ser (Methanol)
# Number of atoms
6
C   -1.954   .117   -.419  12.011  -.0390  3.6527  .3266  CG331   1
O   -1.538   1.221  -1.193  15.999  -.6510  3.1449  .8043  OG311   2
H   -3.023  -.146   -.591   1.008   .0900  2.3876  .1005  HGA3    3
H   -1.301  -.749   -.694   1.008   .0900  2.3876  .1005  HGA3    4
H   -2.292   1.515  -1.711   1.008   .4200   .4000  .1926  HGP1    5
H   -1.797   .384   .656   1.008   .0900  2.3876  .1005  HGA3    6
3
File created by utility MAKEMOL, package MDynaMix
Coordinates taken from file methanol.smol
Force field from file CGEN.ff
# Number of bonds
8
  0   1   2  1.42000  1792.00          #  CG331  -OG311
  0   1   3  1.11100  1348.20          #  CG331  -HGA3
  0   1   4  1.11100  1348.20          #  CG331  -HGA3
  0   1   6  1.11100  1348.20          #  CG331  -HGA3
  0   2   5   .96000  2281.90          #  OG311  -HGP1
# Urey-Bradley terms (for 1-3 neighbours)
  2   3   4  1.80200   22.61          #  HGA3  -HGA3
  2   3   6  1.80200   22.61          #  HGA3  -HGA3
  2   4   6  1.80200   22.61          #  HGA3  -HGA3
# Number of angles
7
  2   1   3  108.8900   192.20          #  OG311  -CG331  -HGA3
  2   1   4  108.8900   192.20          #  OG311  -CG331  -HGA3
  2   1   6  108.8900   192.20          #  OG311  -CG331  -HGA3
  3   1   4  108.4000   148.60          #  HGA3  -CG331  -HGA3
  3   1   6  108.4000   148.60          #  HGA3  -CG331  -HGA3
  4   1   6  108.4000   148.60          #  HGA3  -CG331  -HGA3
  1   2   5  106.0000   240.80          #  CG331  -OG311  -HGP1
# Number of torsions
3
  3   1   2   5   .000   .800   3 #HGA3  -CG331  -OG311  -HGP1
  4   1   2   5   .000   .800   3 #HGA3  -CG331  -OG311  -HGP1
  6   1   2   5   .000   .800   3 #HGA3  -CG331  -OG311  -HGP1
# Special 1-4 interactions
special
1
# I   Sig14   Eps14
  1   3.3854   .0419
#

```

## REFERENCES

- 1 J. Sangster, Octanol-Water Partition Coefficients: Fundamentals and Physical Chemistry, John Wiley & Son Ltd, New York, 1997.

- 2 Sangster Research Laboratories, <http://logkow.cisti.nrc.ca/logkow/index.jsp>, (accessed Oct 3, 2012).
- 3 A. Radzicka and R. Wolfenden, *Biochemistry*, 1988, **27**, 1664–1670.
- 4 A. R. Katritzky, A. A. Oliferenko, P. V. Oliferenko, R. Petrukhin and D. B. Tatham, *J. Chem. Inf. Comput. Sci.*, 2003, **43**, 1794–1805.
- 5 D. L. Mobley, C. I. Bayly, M. D. Cooper, M. R. Shirts and K. A. Dill, *J. Chem. Theory. Comput.*, 2009, **5**, 350–358.
- 6 M. R. Shirts, J. W. Pitner, W. C. Swope and V. S. Pande, *J. Chem. Phys.* 2003, **119**, 5740–5761.
- 7 P. Winget, G. D. Hawkins, C. J. Cramer and D. G. Truhlar, *J. Chem. Phys. B*, 2000, **104**, 4726–4734.
- 8 J. D. Thompson, C. J. Cramer and D. G. Truhlar, *J. Chem. Phys.*, 2003, **119**, 1661–1670.
- 9 A. V. Marenich, C. P. Kelly, J. D. Thompson, G. D. Hawkins, C. C. Chambers, D. J. Giesen, P. Winget, C. J. Cramer and D. G. Truhlar, *Minnesota Solvation Database Version 2007*, University of Minnesota: Minneapolis, MN, 2009.
